# Supplementary material for: Structural dependence of the photocatalytic properties of double perovskite compounds A2InTaO6(A = Sr or Ba) doped with nickel
Source: Royal Society of Chemistry journal article supplement (doi:10.1039/c6cp03522a), 2016-01-01
Supplement: c6cp03522a1.pdf [file c6cp03522a1.pdf]

## Supplementary Information

### Structural dependence of photocatalytic properties over double perovskite compound $A_2InTaO_6$ (A = Sr or Ba) doped with nickel

Meilin Lv<sup>a</sup>, Yawei Wang<sup>a</sup>, Lingwei Lu<sup>a</sup>, Ruinan Wang<sup>a</sup>, Shuang Ni<sup>b</sup>, Gang Liu<sup>c</sup>  
and Xiaoxiang Xu<sup>a,\*</sup>

*<sup>a</sup>Shanghai Key Lab of Chemical Assessment and Sustainability, Department of Chemistry, Tongji University, 1239 Siping Road, Shanghai, 200092, China*

*Email: [xxxu@tongji.edu.cn](mailto:xxxu@tongji.edu.cn), telephone: +86-21-65986919*

*<sup>b</sup>Science and Technology on Plasma Physics Laboratory, Laser Fusion Research Center, China Academy of Engineering Physics, Mianyang 621900, China*

*<sup>c</sup>Shenyang National laboratory for Materials Science, Institute of Metal Research, Chinese Academy of Science, 72 Wenhua Road, Shenyang 110016, China*

### Table of content

Fig. S1 Observed and calculated X-ray powder diffraction patterns of (a)  $Ca_2In_{0.9}Ni_{0.1}TaO_6$ , the refinement converged with good  $R$ -factors ( $R_p = 5.41\%$ ,  $R_{wp} = 7.67\%$ ,  $\chi^2 = 2.943$ ). The refined crystal structure is shown in the inserted image.

Fig. S2 (a) UV-visible light absorption spectra (converted from diffuse reflectance spectra) of freshly prepared samples and (b) Kubelka-Munk transformation of diffuse reflectance data.

Fig. S3 (a) Temporal photocatalytic hydrogen production of all samples in aqueous sodium sulfite (0.05 M) under full range irradiation ( $\lambda \geq 250$  nm), (b) average photocatalytic hydrogen production rate under full range irradiation ( $\lambda \geq 250$  nm) and visible light irradiation ( $\lambda \geq 400$  nm).

Table S1 Energy dispersive X-ray spectroscopy (EDS) analysis of as-prepared samples

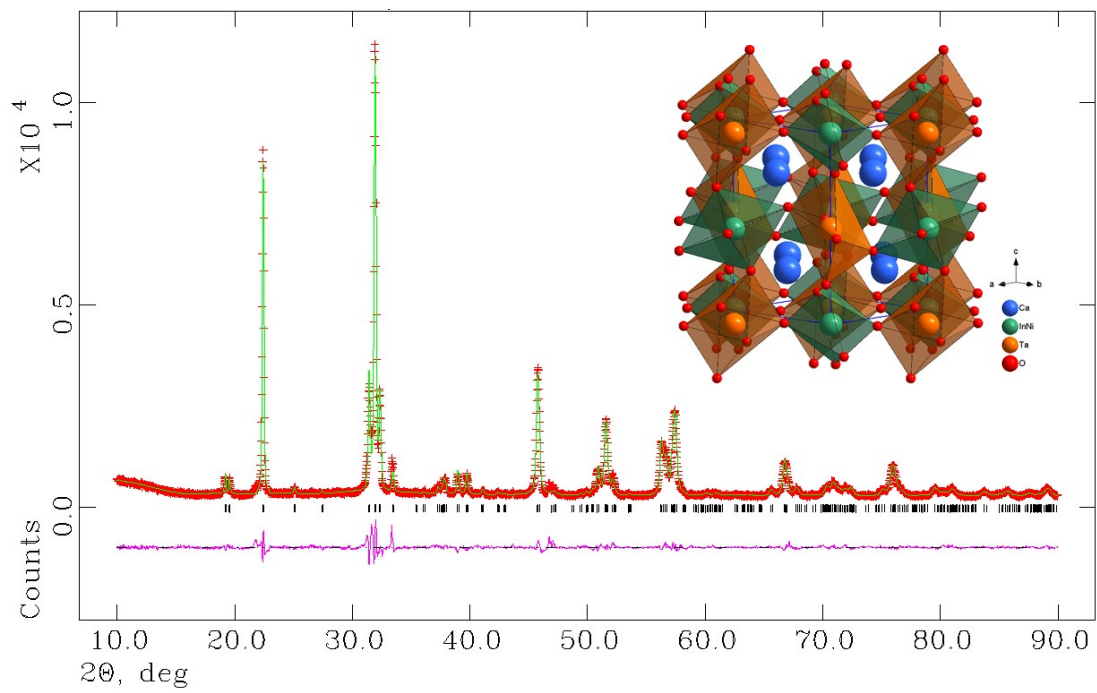

Fig. S1 Observed and calculated X-ray powder diffraction patterns of (a)  $\text{Ca}_2\text{In}_{0.9}\text{Ni}_{0.1}\text{TaO}_6$ , the refinement converged with good  $R$ -factors ( $R_p = 5.41\%$ ,  $R_{wp} = 7.67\%$ ,  $\chi^2 = 2.943$ ). The refined crystal structure is shown in the inserted image.

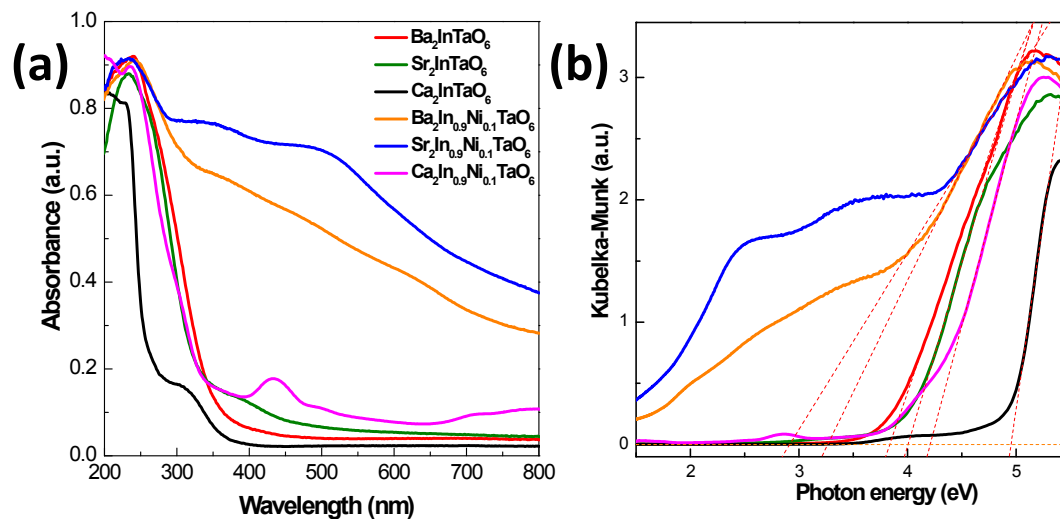

Fig. S2 (a) UV-visible light absorption spectra (converted from diffuse reflectance spectra) of freshly prepared samples and (b) Kubelka-Munk transformation of diffuse reflectance data.

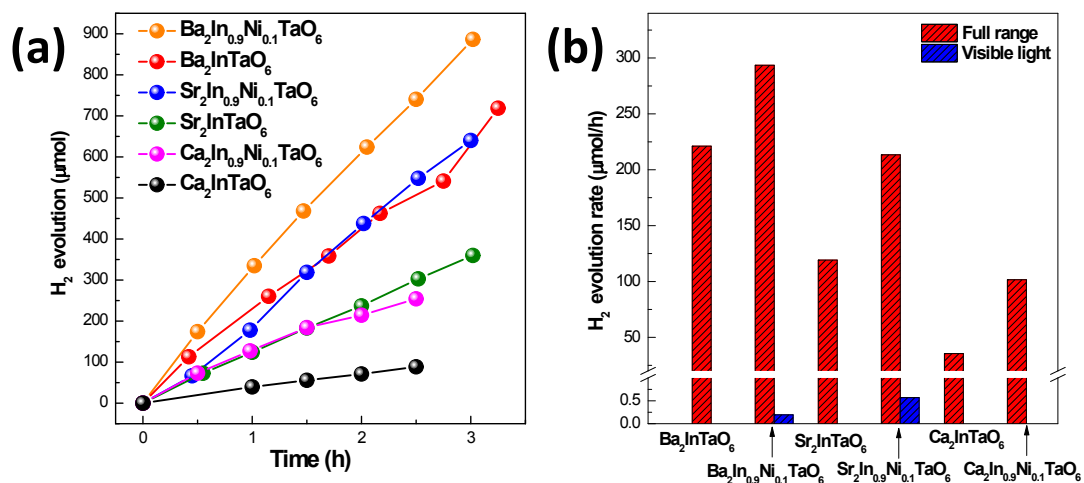

Fig. S3 (a) Temporal photocatalytic hydrogen production of all samples in aqueous sodium sulfite (0.05 M) under full range irradiation ( $\lambda \geq 250$  nm), (b) average photocatalytic hydrogen production rate under full range irradiation ( $\lambda \geq 250$  nm) and visible light irradiation ( $\lambda \geq 400$  nm).

Table S1 Energy dispersive X-ray spectroscopy (EDS) analysis of as-prepared samples

| Samples                                                 | EDS analysis of as-prepared samples (mol%) |      |      |      |       |
|---------------------------------------------------------|--------------------------------------------|------|------|------|-------|
|                                                         | A                                          | In   | Ni   | Ta   | O     |
| $\text{Ca}_2\text{InTaO}_6$                             | 14.86                                      | 7.38 | -    | 8.55 | 69.21 |
| $\text{Ca}_2\text{In}_{0.9}\text{Ni}_{0.1}\text{TaO}_6$ | 17.64                                      | 6.97 | 1.05 | 8.53 | 65.80 |
| $\text{Sr}_2\text{InTaO}_6$                             | 16.80                                      | 8.03 | -    | 7.80 | 67.37 |
| $\text{Sr}_2\text{In}_{0.9}\text{Ni}_{0.1}\text{TaO}_6$ | 17.87                                      | 7.69 | 0.72 | 8.20 | 65.52 |
| $\text{Ba}_2\text{InTaO}_6$                             | 19.44                                      | 9.10 | -    | 8.33 | 63.13 |
| $\text{Ba}_2\text{In}_{0.9}\text{Ni}_{0.1}\text{TaO}_6$ | 20.07                                      | 7.91 | 1.57 | 8.42 | 62.05 |
